# Supplementary material for: Altmetrics as Indicators of Research Dissemination and Impact in Thoracic Surgery
Source: Research Square preprint supplement (doi:10.21203/rs.3.rs-7712630/v1), 2026-01-05
Supplement: Supplementary file 1 [file 37da1c49df2d46df5dbf6d9e.docx]

Supplementary table S1. Top 100 most-cited papers in Thoracic surgery.

| **First author*** | **Citation rank** | **Citations** | **Altmetric rank** | **Altmetric Score** | **Article Type** |
| --- | --- | --- | --- | --- | --- |
| Molina, JR | 1 | 2775 | 1 | 796 | Review |
| Kehlet, H | 2 | 2593 | 6 | 154 | Review |
| Henschke, CI | 3 | 1940 | 16 | 42 | Article |
| Moller, JT | 4 | 1838 | 25 | 20 | Article |
| Bickell, WH | 5 | 1399 | 8 | 128 | Article |
| Desborough, JP | 6 | 1344 | 19 | 28 | Article |
| Keller, AR | 7 | 1178 | 68 | 3 | Article |
| Lassnigg, A | 8 | 1154 | 34 | 12 | Article |
| Pastorino, U | 9 | 1129 | 65 | 4 | Article; Proceedings Paper |
| Mountain, CF | 10 | 1112 | 30 | 15 | Article |
| Albain, Kathy S. | 11 | 1079 | 13 | 51 | Article |
| England, DM | 12 | 1000 | 69 | 3 | Review |
| Perkins, FM | 13 | 960 | 35 | 12 | Review |
| Nuss, D | 14 | 954 | 36 | 12 | Article |
| Frank, SM | 15 | 872 | 78 | 2 | Article |
| National Lung Screening Trial Research Team | 16 | 806 | 14 | 46 | Article, Study design |
| Giulianotti, PC | 17 | 800 | 84 | 0 | Article |
| McKenna, RJ | 18 | 797 | 85 | 0 | Article; Proceedings Paper |
| Owens, BD | 19 | 793 | 15 | 45 | Article |
| Yoshizawa, A | 20 | 791 | 80 | 1 | Article |
| Spira, A | 21 | 748 | 52 | 6 | Review |
| Church, TR | 22 | 744 | 7 | 154 | Article |
| Veterans Affairs Total Parenteral Nutrition Cooperative Study Group | 23 | 739 | 37 | 12 | Article |
| Sone, S | 24 | 734 | 31 | 15 | Article |
| LIU, S | 25 | 732 | 86 | 0 | Review |
| Jena, AB | 26 | 728 | 2 | 677 | Article |
| Ip, HYV | 27 | 706 | 23 | 22 | Review |
| Ballantyne, JC | 28 | 704 | 48 | 7 | Review |
| Neumann, HPH | 29 | 703 | 53 | 6 | Article |
| Cooper, JD | 30 | 695 | 44 | 9 | Article; Proceedings Paper |
| Goldstraw, P | 31 | 684 | 38 | 0 | Article |
| Block, BM | 32 | 684 | 87 | 12 | Review |
| Bendixen, M | 33 | 650 | 20 | 25 | Article |
| Macrae, WA | 34 | 615 | 28 | 17 | Article; Proceedings Paper |
| Paul, S | 35 | 613 | 54 | 6 | Article |
| Yan, TD | 36 | 610 | 55 | 6 | Review |
| Moiniche, S | 37 | 596 | 56 | 6 | Review |
| Cheng, R | 38 | 592 | 10 | 72 | Article |
| Kondo, K | 39 | 586 | 81 | 1 | Article |
| Darling, GE | 40 | 572 | 27 | 16 | Article; Proceedings Paper |
| Yarnitsky, D | 41 | 572 | 29 | 18 | Article |
| Blanco, R | 42 | 561 | 9 | 78 | Article |
| Celis, R | 43 | 555 | 88 | 0 | Article |
| Caillot, D | 44 | 549 | 89 | 0 | Article |
| Ettinger, DS | 45 | 545 | 57 | 6 | Review |
| Katz, J | 46 | 541 | 70 | 3 | Article |
| Mattar, SG | 47 | 535 | 5 | 176 | Article |
| Swensen, SJ | 48 | 535 | 32 | 15 | Article |
| Whitson, BA | 49 | 533 | 58 | 6 | Article; Proceedings Paper |
| Depierre, A | 50 | 523 | 71 | 3 | Article; Proceedings Paper |
| van Meerbeeck, JW | 51 | 518 | 26 | 20 | Article |
| Allen, MS | 52 | 512 | 40 | 11 | Article; Proceedings Paper |
| Kehlet, H | 53 | 510 | 11 | 69 | Article |
| Savic, B | 54 | 505 | 59 | 6 | Article |
| Russell, PA | 55 | 501 | 60 | 6 | Article |
| Lubner, MG | 56 | 495 | 49 | 3 | Review |
| Sahn, SA | 57 | 495 | 72 | 7 | Review |
| Davies, RG | 58 | 487 | 73 | 3 | Review |
| Asamura, H | 59 | 480 | 12 | 61 | Review |
| Gold, JS | 60 | 474 | 74 | 3 | Article; Proceedings Paper |
| Velanovich, V | 61 | 473 | 50 | 7 | Article |
| Arozullah, AM | 62 | 471 | 46 | 8 | Article |
| Nakamura, K | 63 | 470 | 51 | 7 | Article |
| Caillot, D | 64 | 467 | 79 | 2 | Article |
| Khush, KK | 65 | 465 | 41 | 11 | Article |
| Swanson, SJ | 66 | 462 | 90 | 0 | Article; Proceedings Paper |
| Dolin, SJ | 67 | 454 | 61 | 6 | Review |
| Pfannschmidt, J | 68 | 453 | 45 | 9 | Review |
| Arozullah, AM | 69 | 444 | 42 | 11 | Article |
| Jaber, S | 70 | 443 | 22 | 14 | Article |
| Macrae, WA | 71 | 443 | 33 | 23 | Article |
| Joshi, GP | 72 | 441 | 75 | 3 | Review |
| Robinson, TN | 73 | 440 | 43 | 10 | Article |
| Chambers, DC | 74 | 434 | 18 | 29 | Article |
| McLoud, TC | 75 | 434 | 82 | 1 | Article |
| Schreiber, G | 76 | 430 | 62 | 6 | Review |
| Rastan, AJ | 77 | 427 | 83 | 1 | Article; Proceedings Paper |
| Campbell, RM | 78 | 423 | 91 | 0 | Article; Proceedings Paper |
| Valour, F | 79 | 418 | 17 | 35 | Review |
| Landreneau, RJ | 80 | 418 | 92 | 0 | Article; Proceedings Paper |
| Wang, R | 81 | 415 | 24 | 21 | Article |
| T  ravis, WD | 82 | 412 | 47 | 8 | Article; Proceedings Paper |
| Andre, F | 83 | 408 | 76 | 3 | Article |
| Griffith, DE | 84 | 408 | 93 | 0 | Article |
| Bromage, PR | 85 | 401 | 94 | 0 | Article |
| Black, WC | 86 | 399 | 3 | 660 | Article |
| Rubin, GD | 87 | 399 | 77 | 3 | Article |
| Laghi, F | 88 | 395 | 39 | 12 | Review |
| Boffa, DJ | 89 | 389 | 66 | 4 | Article; Proceedings Paper |
| Yasufuku, K | 90 | 387 | 95 | 0 | Article |
| Nagahiro, I | 91 | 382 | 96 | 0 | Article |
| Karmakar, MK | 92 | 377 | 67 | 4 | Review |
| Marx, A | 93 | 376 | 21 | 25 | Review |
| Adzick, NS | 94 | 376 | 97 | 0 | Article; Proceedings Paper |
| Tarhan, S | 95 | 376 | 98 | 0 | Article |
| Rocco, G | 96 | 363 | 99 | 0 | Editorial Material |
| Clarke, H | 97 | 359 | 4 | 650 | Article |
| Shorr, RM | 98 | 357 | 100 | 0 | Article |
| Keller, SM | 99 | 356 | 63 | 6 | Article |
| Sher, T | 100 | 355 | 64 | 6 | Review |

*Corresponding references found in supplementary table S2.

Supplementary table S2. Top 100 most-cited papers with corresponding Vancouver-style references ordered by citation rank

| **Citation Rank** | **Reference** |
| --- | --- |
| 1 | Molina, Julian R.; Yang, Piii G.; Cassivi, Stephen D.; Schild, Steven E.; Adjei, Alex A. Non-small cell lung cancer: Epidemiology, risk factors, treatment, and survivorship. MAYO CLINIC PROCEEDINGS. doi:10.4065/83.5.584. |
| 2 | Kehlet, H; Jensen, TS; Woolf, CJ. Persistent postsurgical pain: risk factors and prevention. LANCET. doi:10.1016/S0140-6736(06)68700-X. |
| 3 | Henschke, CI; McCauley, DI; Yankelevitz, DF; Naidich, DP; McGuinness, G; Miettinen, OS; Libby, DM; Pasmantier, MW; Koizumi, J; Altorki, NK; Smith, JP. Early Lung Cancer Action Project: overall design and findings from baseline screening. LANCET. doi:10.1016/S0140-6736(99)06093-6. |
| 4 | Moller, JT; Cluitmans, P; Rasmussen, LS; Houx, P; Rasmussen, H; Canet, J; Rabbitt, P; Jolles, J; Larsen, K; Hanning, CD; Langeron, O; Johnson, T; Lauven, PM; Kristensen, PA; Biedler, A; van Beem, H; Fraidakis, O; Silverstein, JH; Beneken, JEW; Gravenstein, JS. Long-term postoperative cognitive dysfunction in the elderly: ISPOCD1 study. LANCET. doi:10.1016/S0140-6736(97)07382-0. |
| 5 | BICKELL, WH; WALL, MJ; PEPE, PE; MARTIN, RR; GINGER, VF; ALLEN, MK; MATTOX, KL. IMMEDIATE VERSUS DELAYED FLUID RESUSCITATION FOR HYPOTENSIVE PATIENTS WITH PENETRATING TORSO INJURIES. NEW ENGLAND JOURNAL OF MEDICINE. doi:10.1056/NEJM199410273311701. |
| 6 | Desborough, JP. The stress response to trauma and surgery. BRITISH JOURNAL OF ANAESTHESIA. doi:10.1093/bja/85.1.109. |
| 7 | KELLER, AR; CASTLEMAN, B; HOCHHOLZER, L. HYALINE-VASCULAR AND PLASMA-CELL TYPES OF GIANT LYMPH-NODE HYPERPLASIA OF MEDIASTINUM AND OTHER LOCATIONS. CANCER. doi:10.1002/1097-0142(197203)29:3<670::AID-CNCR2820290321>3.0.CO;2-#. |
| 8 | Lassnigg, A; Schmidlin, D; Mouhieddine, M; Bachmann, LM; Druml, W; Bauer, P; Hiesmayr, M. Minimal changes of serum creatinine predict prognosis in patients after cardiothoracic surgery: A prospective cohort study. JOURNAL OF THE AMERICAN SOCIETY OF NEPHROLOGY. doi:10.1097/01.ASN.0000130340.93930.DD. |
| 9 | Pastorino, U; Buyse, M; Friedel, G; Ginsberg, RJ; Girard, P; Goldstraw, P; Johnston, M; McCormack, P; Pass, H; Putnam, JB; Cerrina, J; Chapelier, A; Dartevelle, P; Baldeyrou, P; Grunenwald, D; Bulzebruck, H; Schirren, J; VogtMoykopf, I; Toomes, H; vanGeel, AN; Cappello, M; Rocmans, P; Pietraszek, A; Sklodowska, M; Andreani, S; Incarbone, M; Ravasi, G; Tavecchio, L; Ambrogi, V; Ricci, C; Mineo, T; Maggi, G; Briccoli, A; Gelmini, R; Heidari, A; Guernelli, N; Beltrami, V; Bains, MS; Burt, ME; Martini, N; McCormack, PM; Rusch, VW; Roth, J; Holmes, C; Temeck, B; Marchand, P. Long-term results of lung metastasectomy: Prognostic analyses based on 5206 cases. JOURNAL OF THORACIC AND CARDIOVASCULAR SURGERY. doi:10.1016/S0022-5223(97)70397-0. |
| 10 | Mountain, CF; Dresler, CM. Regional lymph node classification for lung cancer staging. CHEST. doi:10.1378/chest.111.6.1718. |
| 11 | Albain, Kathy S.; Swann, R. Suzanne; Rusch, Valerie W.; Turrisi, Andrew T., III; Shepherd, Frances A.; Smith, Colum; Chen, Yuhchyau; Livingston, Robert B.; Feins, Richard H.; Gandara, David R.; Fry, Willard A.; Darling, Gail; Johnson, David H.; Green, Mark R.; Miller, Robert C.; Ley, Joanne; Sause, Willliam T.; Cox, James D.. Radiotherapy plus chemotherapy with or without surgical resection for stage III non-small-cell lung cancer: a phase III randomised controlled trial. LANCET. doi:10.1016/S0140-6736(09)60737-6. |
| 12 | ENGLAND, DM; HOCHHOLZER, L; MCCARTHY, MJ. LOCALIZED BENIGN AND MALIGNANT FIBROUS TUMORS OF THE PLEURA - A CLINICOPATHOLOGIC REVIEW OF 223 CASES. AMERICAN JOURNAL OF SURGICAL PATHOLOGY. doi:10.1097/00000478-198908000-00003. |
| 13 | Perkins, FM; Kehlet, H. Chronic pain as an outcome of surgery - A review of predictive factors. ANESTHESIOLOGY. doi:10.1097/00000542-200010000-00038. |
| 14 | Nuss, D; Kelly, RE; Croitoru, DP; Katz, ME. A 10-year review of a minimally invasive technique for the correction of pectus excavatum. JOURNAL OF PEDIATRIC SURGERY. doi:10.1016/S0022-3468(98)90314-1. |
| 15 | Frank, SM; Fleisher, LA; Breslow, MJ; Higgins, MS; Olson, KF; Kelly, S; Beattie, C. Perioperative maintenance of normothermia reduces the incidence of morbid cardiac events - A randomized clinical trial. JAMA-JOURNAL OF THE AMERICAN MEDICAL ASSOCIATION. doi:10.1001/jama.277.14.1127. |
| 16 | Gatsonis CA, et al. The National Lung Screening Trial: Overview and study design. Radiology. 2011;258(1):243-253. doi:10.1148/radiol.10091808 |
| 17 | Giulianotti, PC; Coratti, A; Angelini, M; Sbrana, F; Cecconi, S; Balestracci, T; Caravaglios, G. Robotics in general surgery - Personal experience in a large community hospital. ARCHIVES OF SURGERY. doi:10.1001/archsurg.138.7.777. |
| 18 | McKenna, RJ; Houck, W; Fuller, CB. Video-assisted thoracic surgery lobectomy: Experience with 1,100 cases. ANNALS OF THORACIC SURGERY. doi:10.1016/j.athoracsur.2005.07.078. |
| 19 | Owens, Brett D.; Kragh, John F., Jr.; Wenke, Joseph C.; Macaitis, Joseph; Wade, Charles E.; Holcomb, John B.. Combat wounds in operation Iraqi freedom and operation enduring freedom. JOURNAL OF TRAUMA AND ACUTE CARE SURGERY. doi:10.1097/TA.0b013e318163b875. |
| 20 | Yoshizawa, Akihiko; Motoi, Noriko; Riely, Gregory J.; Sima, Cami S.; Gerald, William L.; Kris, Mark G.; Park, Bernard J.; Rusch, Valerie W.; Travis, William D.. Impact of proposed IASLC/ATS/ERS classification of lung adenocarcinoma: prognostic subgroups and implications for further revision of staging based on analysis of 514 stage I cases. MODERN PATHOLOGY. doi:10.1038/modpathol.2010.232. |
| 21 | Spira, A; Ettinger, DS. Drug therapy: Multidisciplinary management of lung cancer. NEW ENGLAND JOURNAL OF MEDICINE. doi:10.1056/NEJMra035536. |
| 22 | Church, Timothy R.; Black, William C.; Aberle, Denise R.; Berg, Christine D.; Clingan, Kathy L.; Duan, Fenghai; Fagerstrom, Richard M.; Gareen, Ilana F.; Gierada, David S.; Jones, Gordon C.; Mahon, Irene; Marcus, Pamela M.; Sicks, JoRean D.; Jain, Amanda; Baum, Sarah. Results of Initial Low-Dose Computed Tomographic Screening for Lung Cancer17. NEW ENGLAND JOURNAL OF MEDICINE. doi:10.1056/NEJMoa1209120. |
| 23 | Veterans Affairs Total Parenteral Nutrition Cooperative Study Group. Perioperative total parenteral nutrition in surgical patients. N Engl J Med. 1991;325(8):525-532. doi:10.1056/NEJM199108223250801 |
| 24 | Sone, S; Takashima, S; Li, F; Yang, ZG; Honda, T; Maruyama, Y; Hasegawa, M; Yamanda, T; Kubo, K; Hanamura, K; Asakura, K. Mass screening for lung cancer with mobile spiral computed tomography scanner. LANCET. doi:10.1016/S0140-6736(97)08229-9. |
| 25 | LIU, S; CARPENTER, RL; NEAL, JM. EPIDURAL-ANESTHESIA AND ANALGESIA - THEIR ROLE IN POSTOPERATIVE OUTCOME. ANESTHESIOLOGY. doi:10.1097/00000542-199506000-00019. |
| 26 | Jena, Anupam B.; Seabury, Seth; Lakdawalla, Darius; Chandra, Amitabh. Malpractice Risk According to Physician Specialty. NEW ENGLAND JOURNAL OF MEDICINE. doi:10.1056/NEJMsa1012370. |
| 27 | Ip, Hui Yun Vivian; Abrishami, Amir; Peng, Philip W. H.; Wong, Jean; Chung, Frances. Predictors of Postoperative Pain and Analgesic Consumption A Qualitative Systematic Review. ANESTHESIOLOGY. doi:10.1097/ALN.0b013e3181aae87a. |
| 28 | Ballantyne, JC; Carr, DB; deFerranti, S; Suarez, T; Lau, J; Chalmers, TC; Angelillo, IF; Mosteller, F. The comparative effects of postoperative analgesic therapies on pulmonary outcome: Cumulative meta-analyses of randomized, controlled trials. ANESTHESIA AND ANALGESIA. doi:10.1097/00000539-199803000-00032. |
| 29 | Neumann, HPH; Pawlu, C; Peczkowska, M; Bausch, B; MeWhinney, SR; Muresan, M; Buchta, M; Franke, G; Klisch, J; Bley, TA; Hoegerle, S; Boedeker, CC; Opocher, G; Schipper, J; Januszewicz, A; Eng, C. Distinct clinical features of paraganglioma syndromes associated with SDHB and SDHD gene mutations. JAMA-JOURNAL OF THE AMERICAN MEDICAL ASSOCIATION. doi:10.1001/jama.292.8.943. |
| 30 | COOPER, JD; TRULOCK, EP; TRIANTAFILLOU, AN; PATTERSON, GA; POHL, MS; DELONEY, PA; SUNDARESAN, RS; ROPER, CL. BILATERAL PNEUMECTOMY (VOLUME REDUCTION) FOR CHRONIC OBSTRUCTIVE PULMONARY-DISEASE. JOURNAL OF THORACIC AND CARDIOVASCULAR SURGERY. doi:10.1016/S0022-5223(95)70426-4. |
| 31 | Goldstraw, Peter; Ball, David; Jett, James R.; Le Chevalier, Thierry; Lim, Eric; Nicholson, Andrew G.; Shepherd, Frances A.. Non-small-cell lung cancer. LANCET. doi:10.1016/S0140-6736(10)62101-0. |
| 32 | Block, BM; Liu, SS; Rowlingson, AJ; Cowan, AR; Cowan, JA; Wu, CL. Efficacy of postoperative epidural analgesia - A meta-analysis. JAMA-JOURNAL OF THE AMERICAN MEDICAL ASSOCIATION. doi:10.1001/jama.290.18.2455. |
| 33 | Bendixen, Morten; Jorgensen, Ole Dan; Kronborg, Christian; Andersen, Claus; Licht, Peter Bjorn. Postoperative pain and quality of life after lobectomy via video-assisted thoracoscopic surgery or anterolateral thoracotomy for early stage lung cancer: a randomised controlled trial. LANCET ONCOLOGY. doi:10.1016/S1470-2045(16)00173-X. |
| 34 | Macrae, W. A.. Chronic post-surgical pain: 10 years on. BRITISH JOURNAL OF ANAESTHESIA. doi:10.1093/bja/aen099. |
| 35 | Paul, Subroto; Altorki, Nasser K.; Sheng, Shubin; Lee, Paul C.; Harpole, David H.; Onaitis, Mark W.; Stiles, Brendon M.; Port, Jeffrey L.; D'Amico, Thomas A.. Thoracoscopic lobectomy is associated with lower morbidity than open lobectomy: A propensity-matched analysis from the STS database. JOURNAL OF THORACIC AND CARDIOVASCULAR SURGERY. doi:10.1016/j.jtcvs.2009.08.026. |
| 36 | Yan, Tristan D.; Black, Deborah; Bannon, Paul G.; McCaughan, Brian C.. Systematic Review and Meta-Analysis of Randomized and Nonrandomized Trials on Safety and Efficacy of Video-Assisted Thoracic Surgery Lobectomy for Early-Stage Non-Small-Cell Lung Cancer. JOURNAL OF CLINICAL ONCOLOGY. doi:10.1200/JCO.2008.18.2733. |
| 37 | Moiniche, S; Kehlet, H; Dahl, JB. A qualitative and quantitative systematic review of preemptive analgesia for postoperative pain relief - The role of timing of analgesia. ANESTHESIOLOGY. doi:10.1097/00000542-200203000-00032. |
| 38 | Cheng, Richard; Hachamovitch, Rory; Kittleson, Michelle; Patel, Jignesh; Arabia, Francisco; Moriguchi, Jaime; Esmailian, Fardad; Azarbal, Babak. Complications of Extracorporeal Membrane Oxygenation for Treatment of Cardiogenic Shock and Cardiac Arrest: A Meta-Analysis of 1,866 Adult Patients. ANNALS OF THORACIC SURGERY. doi:10.1016/j.athoracsur.2013.09.008. |
| 39 | Kondo, K; Monden, Y. Therapy for thymic epithelial tumors: A clinical study of 1,320 patients from Japan. ANNALS OF THORACIC SURGERY. doi:10.1016/S0003-4975(03)00555-1. |
| 40 | Darling, Gail E.; Allen, Mark S.; Decker, Paul A.; Ballman, Karla; Malthaner, Richard A.; Inculet, Richard I.; Jones, David R.; McKenna, Robert J.; Landreneau, Rodney J.; Rusch, Valerie W.; Putnam, Joe B., Jr.. Randomized trial of mediastinal lymph node sampling versus complete lymphadenectomy during pulmonary resection in the patient with N0 or N1 (less than hilar) non-small cell carcinoma: Results of the American College of Surgery Oncology Group Z0030 Trial. JOURNAL OF THORACIC AND CARDIOVASCULAR SURGERY. doi:10.1016/j.jtcvs.2010.11.008. |
| 41 | Yarnitsky, David; Crispel, Yonathan; Eisenberg, Elon; Granovsky, Yelena; Ben-Nun, Alon; Sprecher, Elliot; Best, Lael-Anson; Granot, Michal. Prediction of chronic post-operative pain: Pre-operative DNIC testing identifies patients at risk. PAIN. doi:10.1016/j.pain.2007.10.033. |
| 42 | Blanco, R.; Parras, T.; McDonnell, J. G.; Prats-Galino, A.. Serratus plane block: a novel ultrasound-guided thoracic wall nerve block. ANAESTHESIA. doi:10.1111/anae.12344. |
| 43 | CELIS, R; TORRES, A; GATELL, JM; ALMELA, M; RODRIGUEZROISIN, R; AGUSTIVIDAL, A. NOSOCOMIAL PNEUMONIA - A MULTIVARIATE-ANALYSIS OF RISK AND PROGNOSIS. CHEST. doi:10.1378/chest.93.2.318. |
| 44 | Caillot, D; Casasnovas, O; Bernard, A; Couaillier, JF; Durand, C; Cuisenier, B; Solary, E; Piard, F; Petrella, T; Bonnin, A; Couillault, G; Dumas, M; Guy, H. Improved management of invasive pulmonary aspergillosis in neutropenic patients using early thoracic computed tomographic scan and surgery. JOURNAL OF CLINICAL ONCOLOGY. doi:10.1200/JCO.1997.15.1.139. |
| 45 | Ettinger, David S.; Akerley, Wallace; Bepler, Gerold; Blum, Matthew G.; Chang, Andrew; Cheney, Richard T.; Chirieac, Lucian R.; D'Amico, Thomas A.; Demmy, Todd L.; Ganti, Apar Kishor P.; Govindan, Ramaswamy; Grannis, Frederic W., Jr.; Jahan, Thierry; Jahanzeb, Mohammad; Johnson, David H.; Kessinger, Anne; Komaki, Ritsuko; Kong, Feng-Ming; Kris, Mark G.; Krug, Lee M.; Le, Quynh-Thu; Lennes, Inga T.; Martins, Renato; O'Malley, Janis; Osarogiagbon, Raymond U.; Otterson, Gregory A.; Patel, Jyoti D.; Pisters, Katherine M.; Reckamp, Karen; Riely, Gregory J.; Rohren, Eric; Simon, George R.; Swanson, Scott J.; Wood, Douglas E.; Yang, Stephen C.. Non Small Cell Lung Cancer. JOURNAL OF THE NATIONAL COMPREHENSIVE CANCER NETWORK. doi:10.6004/jnccn.2010.0056. |
| 46 | Katz, J; Jackson, M; Kavanagh, BP; Sandler, AN. Acute pain after thoracic surgery predicts long-term post-thoracotomy pain. CLINICAL JOURNAL OF PAIN. doi:10.1097/00002508-199603000-00009. |
| 47 | Mattar, Samer G.; Alseidi, Adnan A.; Jones, Daniel B.; Jeyarajah, D. Rohan; Swanstrom, Lee L.; Aye, Ralph W.; Wexner, Steven D.; Martinez, Jose M.; Ross, Sharona B.; Awad, Michael M.; Franklin, Morris E.; Arregui, Maurice E.; Schirmer, Bruce D.; Minter, Rebecca M.. General Surgery Residency Inadequately Prepares Trainees for Fellowship Results of a Survey of Fellowship Program Directors. ANNALS OF SURGERY. doi:10.1097/SLA.0b013e3182a191ca. |
| 48 | Swensen, SJ; Jett, JR; Hartman, TE; Midthun, DE; Mandrekar, SJ; Hillman, SL; Sykes, AM; Aughenbaugh, GL; Bungum, AO; Allen, KL. CT screening for lung cancer: Five-year prospective experience. RADIOLOGY. doi:10.1148/radiol.2351041662. |
| 49 | Whitson, Bryan A.; Groth, Shawn S.; Duval, Susan J.; Swanson, Scott J.; Maddaus, Michael A.. Surgery for Early-Stage Non-Small Cell Lung Cancer: A Systematic Review of the Video-Assisted Thoracoscopic Surgery Versus Thoracotomy Approaches to Lobectomy. ANNALS OF THORACIC SURGERY. doi:10.1016/j.athoracsur.2008.07.009. |
| 50 | Depierre, A; Milleron, B; Moro-Sibilot, D; Chevret, S; Quoix, E; Lebeau, B; Braun, D; Breton, JL; Lemarié, E; Gouva, S; Paillot, N; Bréchot, JM; Janicot, H; Lebas, FX; Terrioux, P; Clavier, J; Foucher, P; Monchâtre, M; Coëtmeur, D; Level, MC; Leclerc, P; Blanchon, F; Rodier, JM; Thiberville, L; Villeneuve, A; Westeel, V; Chastang, C. Preoperative chemotherapy followed by surgery compared with primary surgery in resectable stage I (except T1N0), II, and IIIa non-small-cell lung cancer. JOURNAL OF CLINICAL ONCOLOGY. doi:10.1200/JCO.20.1.247. |
| 51 | van Meerbeeck, Jan P.; Kramer, Gijs W. P. M.; Van Schil, Paul E. Y.; Legrand, Catherine; Smit, Egbert F.; Schramel, Franz; Tjan-Heijnen, Vivianne C.; Biesma, Bonne; Debruyne, Channa; van Zandwijk, Nico; Splinter, Ted A. W.; Giaccone, Giuseppe. Randomized controlled trial of resection versus radiotherapy after induction chemotherapy in stage IIIA-N2 non-small-cell lung cancer. JNCI-JOURNAL OF THE NATIONAL CANCER INSTITUTE. doi:10.1093/jnci/djk093. |
| 52 | Allen, MS; Darling, GE; Pechet, TTV; Mitchell, JD; Herndon, JE; Landreneau, RJ; Inculet, RI; Jones, DR; Meyers, BF; Harpole, DH; Putnam, JB; Rusch, VW. Morbidity and mortality of major pulmonary resections in patients with early-stage lung cancer: Initial results of the randomized, prospective ACOSOG Z0030 trial. ANNALS OF THORACIC SURGERY. doi:10.1016/j.athoracsur.2005.06.066. |
| 53 | Kehlet, H; Holte, K. Effect of postoperative analgesia on surgical outcome. BRITISH JOURNAL OF ANAESTHESIA. doi:10.1093/bja/87.1.62. |
| 54 | SAVIC, B; BIRTEL, FJ; THOLEN, W; FUNKE, HD; KNOCHE, R. LUNG SEQUESTRATION - REPORT OF 7 CASES AND REVIEW OF 540 PUBLISHED CASES. THORAX. doi:10.1136/thx.34.1.96. |
| 55 | Russell, Prudence A.; Wainer, Zoe; Wright, Gavin M.; Daniels, Marissa; Conron, Matthew; Williams, Richard A.. Does Lung Adenocarcinoma Subtype Predict Patient Survival? A Clinicopathologic Study Based on the New International Association for the Study of Lung Cancer/American Thoracic Society/European Respiratory Society International Multidisciplinary Lung Adenocarcinoma Classification. JOURNAL OF THORACIC ONCOLOGY. doi:10.1097/JTO.0b013e318221f701. |
| 56 | Lubner, Meghan G.; Brace, Christopher L.; Hinshaw, J. Louis; Lee, Fred T., Jr.. Microwave Tumor Ablation: Mechanism of Action, Clinical Results, and Devices. JOURNAL OF VASCULAR AND INTERVENTIONAL RADIOLOGY. doi:10.1016/j.jvir.2010.04.007. |
| 57 | Sahn, SA; Heffner, JE. Spontaneous pneumothorax. NEW ENGLAND JOURNAL OF MEDICINE. doi:10.1056/NEJM200003233421207. |
| 58 | Davies, RG; Myles, PS; Graham, JM. A comparison of the analgesic efficacy and side-effects of paravertebral vs epidural blockade for thoracotomy -: a systematic review and meta-analysis of randomized trials. BRITISH JOURNAL OF ANAESTHESIA. doi:10.1093/bja/ael020. |
| 59 | Asamura, Hisao; Chansky, Kari; Crowley, John; Goldstraw, Peter; Rusch, Valerie W.; Vansteenkiste, Johan F.; Watanabe, Hirokazu; Wu, Yi-Long; Zielinski, Marcin; Ball, David; Rami-Porta, Ramon. The International Association for the Study of Lung Cancer Lung Cancer Staging Project Proposals for the Revision of the N Descriptors in the Forthcoming 8th Edition of the TNM Classification for Lung Cancer. JOURNAL OF THORACIC ONCOLOGY. doi:10.1097/JTO.0000000000000678. |
| 60 | Gold, JS; Antonescu, CR; Hajdu, C; Ferrone, CR; Hussain, M; Lewis, JJ; Brennan, MF; Coit, DG. Clinicopathologic correlates of solitary fibrous tumors. CANCER. doi:10.1002/cncr.10328. |
| 61 | Velanovich, Vic; Antoine, Heath; Swartz, Andrew; Peters, David; Rubinfeld, Ilan. Accumulating deficits model of frailty and postoperative mortality and morbidity: its application to a national database. JOURNAL OF SURGICAL RESEARCH. doi:10.1016/j.jss.2013.01.021. |
| 62 | Arozullah, AM; Khuri, SF; Henderson, WG; Daley, J. Development and validation of a multifactorial risk index for predicting postoperative pneumonia after major noncardiac surgery. ANNALS OF INTERNAL MEDICINE. doi:10.7326/0003-4819-135-10-200111200-00005. |
| 63 | Nakamura, Kenichi; Saji, Hisashi; Nakajima, Ryu; Okada, Morihito; Asamura, Hisao; Shibata, Taro; Nakamura, Shinichiro; Tada, Hirohito; Tsuboi, Masahiro. A Phase III Randomized Trial of Lobectomy Versus Limited Resection for Small-sized Peripheral Non-small Cell Lung Cancer (JCOG0802/WJOG4607L). JAPANESE JOURNAL OF CLINICAL ONCOLOGY. doi:10.1093/jjco/hyp156. |
| 64 | Caillot, D; Couaillier, JF; Bernard, A; Casasnovas, O; Denning, DW; Mannone, L; Lopez, J; Couillault, G; Piard, F; Vagner, O; Guy, H. Increasing volume and changing characteristics of invasive pulmonary aspergillosis on sequential thoracic computed tomography scans in patients with neutropenia. JOURNAL OF CLINICAL ONCOLOGY. doi:10.1200/JCO.2001.19.1.253. |
| 65 | Khush, Kiran K.; Cherikh, Wida S.; Chambers, Daniel C.; Harhay, Michael O.; Hayes, Don, Jr.; Hsich, Eileen; Meiser, Bruno; Potena, Luciano; Robinson, Amanda; Rossano, Joseph W.; Sadavarte, Aparna; Singh, Tajinder P.; Zuckermann, Andreas; Stehlik, Josef. The International Thoracic Organ Transplant Registry of the International Society for Heart and Lung Transplantation: Thirty-sixth adult heart transplantation report-2019; focus theme: Donor and recipient size match. JOURNAL OF HEART AND LUNG TRANSPLANTATION. doi:10.1016/j.healun.2019.08.004. |
| 66 | Swanson, Scott J.; Herndon, James E., II; D'Amico, Thomas A.; Demmy, Todd L.; McKenna, Robert J., Jr.; Green, Mark R.; Sugarbaker, David J.. Video-assisted thoracic surgery lobectomy: Report of CALGB 39802 - A prospective, multi-institution feasibility study. JOURNAL OF CLINICAL ONCOLOGY. doi:10.1200/JCO.2007.12.6649. |
| 67 | Dolin, SJ; Cashman, JN; Bland, JM. Effectiveness of acute postoperative pain management: I. Evidence from published data. BRITISH JOURNAL OF ANAESTHESIA. doi:10.1093/bja/aef207. |
| 68 | Pfannschmidt, Joachim; Dienemann, Hendrik; Hoffmann, Hans. Surgical resection of pulmonary metastases from colorectal cancer: A systematic review of published series. ANNALS OF THORACIC SURGERY. doi:10.1016/j.athoracsur.2007.02.093. |
| 69 | Arozullah, AM; Daley, J; Henderson, WG; Khuri, SF. Multifactorial risk index for predicting postoperative respiratory failure in men after major noncardiac surgery. ANNALS OF SURGERY. doi:10.1097/00000658-200008000-00015. |
| 70 | Jaber, Samir; Petrof, Basil J.; Jung, Boris; Chanques, Gerald; Berthet, Jean-Philippe; Rabuel, Christophe; Bouyabrine, Hassan; Courouble, Patricia; Koechlin-Ramonatxo, Christelle; Sebbane, Mustapha; Similowski, Thomas; Scheuermann, Valerie; Mebazaa, Alexandre; Capdevila, Xavier; Mornet, Dominique; Mercier, Jacques; Lacampagne, Alain; Philips, Alexandre; Matecki, Stefan. Rapidly Progressive Diaphragmatic Weakness and Injury during Mechanical Ventilation in Humans. AMERICAN JOURNAL OF RESPIRATORY AND CRITICAL CARE MEDICINE. doi:10.1164/rccm.201004-0670OC. |
| 71 | Macrae, WA. Chronic pain after surgery. BRITISH JOURNAL OF ANAESTHESIA. doi:10.1093/bja/87.1.88. |
| 72 | Joshi, Girish P.; Bonnet, Francis; Shah, Rajesh; Wilkinson, Roseanne C.; Camu, Frederic; Fischer, Barrie; Neugebauer, Edmund A. M.; Rawal, Narinder; Schug, Stephan A.; Simanski, Christian; Kehlet, Henrik. A systematic review of randomized trials evaluating regional techniques for postthoracotomy analgesia. ANESTHESIA AND ANALGESIA. doi:10.1213/01.ane.0000333274.63501.ff. |
| 73 | Robinson, Thomas N.; Raeburn, Christopher D.; Tran, Zung V.; Angles, Erik M.; Brenner, Lisa A.; Moss, Marc. Postoperative Delirium in the Elderly Risk Factors and Outcomes. ANNALS OF SURGERY. doi:10.1097/SLA.0b013e31818e4776. |
| 74 | Chambers, Daniel C.; Cherikh, Wida S.; Harhay, Michael O.; Hayes, Don, Jr.; Hsich, Eileen; Khush, Kiran K.; Meiser, Bruno; Potena, Luciano; Rossano, Joseph W.; Toll, Alice E.; Singh, Tajinder P.; Sadavarte, Aparna; Zuckermann, Andreas; Stehlik, Josef. The International Thoracic Organ Transplant Registry of the International Society for Heart and Lung Transplantation: Thirty-sixth adult lung and heart-lung transplantation Report-2019; Focus theme: Donor and recipient size match. JOURNAL OF HEART AND LUNG TRANSPLANTATION. doi:10.1016/j.healun.2019.08.001. |
| 75 | MCLOUD, TC; BOURGOUIN, PM; GREENBERG, RW; KOSIUK, JP; TEMPLETON, PA; SHEPARD, JAO; MOORE, EH; WAIN, JC; MATHISEN, DJ; GRILLO, HC. BRONCHOGENIC-CARCINOMA - ANALYSIS OF STAGING IN THE MEDIASTINUM WITH CT BY CORRELATIVE LYMPH-NODE MAPPING AND SAMPLING. RADIOLOGY. doi:10.1148/radiology.182.2.1732943. |
| 76 | Schreiber, G; McCrory, DC. Performance characteristics of different modalities for diagnosis of suspected lung cancer - Summary of published evidence. CHEST. doi:10.1378/chest.123.1_suppl.115S. |
| 77 | Rastan, Ardawan Julian; Dege, Andreas; Mohr, Matthias; Doll, Nicolas; Falk, Volkmar; Walther, Thomas; Mohr, Friedrich Wilhelm. Early and late outcomes of 517 consecutive adult patients treated with extracorporeal membrane oxygenation for refractory postcardiotomy cardiogenic shock. JOURNAL OF THORACIC AND CARDIOVASCULAR SURGERY. doi:10.1016/j.jtcvs.2009.10.043. |
| 78 | Campbell, RM; Smith, MD; Mayes, TC; Mangos, JA; Willey-Courand, DB; Kose, N; Pinero, RF; Alder, ME; Duong, HL; Surber, JL. The characteristics of thoracic insufficiency syndrome associated with fused ribs and congenital scoliosis. JOURNAL OF BONE AND JOINT SURGERY-AMERICAN VOLUME. doi:10.2106/00004623-200303000-00001. |
| 79 | Valour, Florent; Senechal, Agathe; Dupieux, Celine; Karsenty, Judith; Lustig, Sebastien; Breton, Pierre; Gleizal, Arnaud; Boussel, Loic; Laurent, Frederic; Braun, Evelyne; Chidiac, Christian; Ader, Florence; Ferry, Tristan. Actinomycosis: etiology, clinical features, diagnosis, treatment, and management. INFECTION AND DRUG RESISTANCE. doi:10.2147/IDR.S39601. |
| 80 | LANDRENEAU, RJ; HAZELRIGG, SR; MACK, MJ; DOWLING, RD; BURKE, D; GAVLICK, J; PERRINO, MK; RITTER, PS; BOWERS, CM; DEFINO, J; NUNCHUCK, SK; FREEMAN, J; KEENAN, RJ; FERSON, PF. POSTOPERATIVE PAIN-RELATED MORBIDITY - VIDEO-ASSISTED THORACIC-SURGERY VERSUS THORACOTOMY. ANNALS OF THORACIC SURGERY. doi:10.1016/0003-4975(93)90667-7. |
| 81 | Wang, Rui; Hu, Haichuan; Pan, Yunjian; Li, Yuan; Ye, Ting; Li, Chenguang; Luo, Xiaoyang; Wang, Lei; Li, Hang; Zhang, Yang; Li, Fei; Lu, Yongming; Lu, Qiong; Xu, Jie; Garfield, David; Shen, Lei; Ji, Hongbin; Pao, William; Sun, Yihua; Chen, Haiquan. RET Fusions Define a Unique Molecular and Clinicopathologic Subtype of Non-Small-Cell Lung Cancer. JOURNAL OF CLINICAL ONCOLOGY. doi:10.1200/JCO.2012.44.1477. |
| 82 | Travis, William D.; Brambilla, Elisabeth; Riely, Gregory J.. New Pathologic Classification of Lung Cancer: Relevance for Clinical Practice and Clinical Trials. JOURNAL OF CLINICAL ONCOLOGY. doi:10.1200/JCO.2012.46.9270. |
| 83 | Andre, F; Grunenwald, D; Pignon, JP; Dujon, A; Pujol, JL; Brichon, PY; Brouchet, L; Quoix, E; Westeel, V; Le Chevalier, T. Survival of patients with resected N2 non-small-cell lung cancer: Evidence for a subclassification and implications. JOURNAL OF CLINICAL ONCOLOGY. doi:10.1200/JCO.2000.18.16.2981. |
| 84 | GRIFFITH, DE; GIRARD, WM; WALLACE, RJ. CLINICAL-FEATURES OF PULMONARY-DISEASE CAUSED BY RAPIDLY GROWING MYCOBACTERIA - AN ANALYSIS OF 154 PATIENTS. AMERICAN REVIEW OF RESPIRATORY DISEASE. doi:10.1164/ajrccm/147.5.1271. |
| 85 | BROMAGE, PR; CAMPORESI, E; CHESTNUT, D. EPIDURAL NARCOTICS FOR POSTOPERATIVE ANALGESIA. ANESTHESIA AND ANALGESIA. doi:nan. |
| 86 | Black, William C.; Gareen, Ilana F.; Soneji, Samir S.; Sicks, JoRean D.; Keeler, Emmett B.; Aberle, Denise R.; Naeim, Arash; Church, Timothy R.; Silvestri, Gerard A.; Gorelick, Jeremy; Gatsonis, Constantine. Cost-Effectiveness of CT Screening in the National Lung Screening Trial. NEW ENGLAND JOURNAL OF MEDICINE. doi:10.1056/NEJMoa1312547. |
| 87 | Rubin, GD; Beaulieu, CF; Argiro, V; Ringl, H; Norbash, AM; Feller, JF; Dake, MD; Jeffrey, RB; Napel, S. Perspective volume rendering of CT and MR images: Applications for endoscopic imaging. RADIOLOGY. doi:10.1148/radiology.199.2.8668772. |
| 88 | Laghi, F; Tobin, MJ. Disorders of the respiratory muscles. AMERICAN JOURNAL OF RESPIRATORY AND CRITICAL CARE MEDICINE. doi:10.1164/rccm.2206020. |
| 89 | Boffa, Daniel J.; Allen, Mark S.; Grab, Joshua D.; Gaissert, Henning A.; Harpole, David H.; Wright, Cameron D.. Data from the society of thoracic surgeons general thoracic surgery database: The surgical management of primary lung tumors. JOURNAL OF THORACIC AND CARDIOVASCULAR SURGERY. doi:10.1016/j.jtcvs.2007.07.060. |
| 90 | Yasufuku, Kazuhiro; Nakajima, Takahiro; Motoori, Ken; Sekine, Yasuo; Shibuya, Kiyoshi; Hiroshima, Kenzo; Fujisawa, Takehiko. Comparison of endobronchial ultrasound, positron emission tomography, and CT for lymph node staging of lung cancer. CHEST. doi:10.1378/chest.130.3.710. |
| 91 | Nagahiro, I; Andou, A; Aoe, M; Sano, Y; Date, H; Shimizu, N. Pulmonary function, postoperative pain, and serum cytokine level after lobectomy: A comparison of VATS and conventional procedure. ANNALS OF THORACIC SURGERY. doi:10.1016/S0003-4975(01)02804-1. |
| 92 | Karmakar, MK. Thoracic paravertebral block. ANESTHESIOLOGY. doi:10.1097/00000542-200109000-00033. |
| 93 | Marx, Alexander; Chan, John K. C.; Coindre, Jean-Michel; Detterbeck, Frank; Girard, Nicolas; Harris, Nancy L.; Jaffe, Elaine S.; Kurrer, Michael O.; Marom, Edith M.; Moreira, Andre L.; Mukai, Kiyoshi; Orazi, Attilio; Stroebel, Philipp. The 2015 World Health Organization Classification of Tumors of the Thymus Continuity and Changes. JOURNAL OF THORACIC ONCOLOGY. doi:10.1097/JTO.0000000000000654. |
| 94 | Adzick, NS; Harrison, MR; Crombleholme, TM; Flake, AW; Howell, LJ. Fetal lung lesions: Management and outcome. AMERICAN JOURNAL OF OBSTETRICS AND GYNECOLOGY. doi:10.1016/S0002-9378(98)70183-8. |
| 95 | TARHAN, S; TAYLOR, WF; MOFFITT, EA; GIULIANI, ER. MYOCARDIAL-INFARCTION AFTER GENERAL ANESTHESIA. JOURNAL OF THE AMERICAN MEDICAL ASSOCIATION. doi:10.1001/jama.220.11.1451. |
| 96 | Rocco, G; Martin-Ucar, A; Passera, E. Uniportal VATS wedge pulmonary resections. ANNALS OF THORACIC SURGERY. doi:10.1016/S0003-4975(03)01219-0. |
| 97 | Clarke, Hance; Soneji, Neilesh; Ko, Dennis T.; Yun, Lingsong; Wijeysundera, Duminda N.. Rates and risk factors for prolonged opioid use after major surgery: population based cohort study. BMJ-BRITISH MEDICAL JOURNAL. doi:10.1136/bmj.g1251. |
| 98 | SHORR, RM; CRITTENDEN, M; INDECK, M; HARTUNIAN, SL; RODRIGUEZ, A. BLUNT THORACIC TRAUMA - ANALYSIS OF 515 PATIENTS. ANNALS OF SURGERY. doi:10.1097/00000658-198708000-00013. |
| 99 | Keller, SM; Adak, S; Wagner, H; Herskovic, A; Komaki, R; Brooks, BJ; Perry, MC; Livingston, RB; Johnson, DH. A randomized trial of postoperative adjuvant therapy in patients with completely resected stage II or IIIa non-small-cell lung cancer.. NEW ENGLAND JOURNAL OF MEDICINE. doi:10.1056/NEJM200010263431703. |
| 100 | Sher, Taimur; Dy, Grace K.; Adjei, Alex A.. Small cell lung cancer. MAYO CLINIC PROCEEDINGS. doi:10.4065/83.3.355. |
